# Supplementary material for: Gadolinium-chelate functionalized copper sulphide as a nanotheranostic agent for MR imaging and photothermal destruction of cancer cells
Source: Royal Society of Chemistry journal article supplement (doi:10.1039/c3cc43440k), 2013-01-01
Supplement: c3cc43440k.pdf [file c3cc43440k.pdf]

## Electronic Supplementary Information

### Gadolinium chelates functionalized copper sulphide as a nanotheranostic agent for MR imaging and photothermal destruction of cancer cells

Shuhai Zhang,<sup>b</sup> Zhengbao Zha,<sup>b</sup> Xiuli Yue,<sup>b</sup> Xiaolong Liang<sup>a</sup> and Zhifei Dai<sup>\*a</sup>

<sup>a</sup> Department of Biomedical Engineering, College of Engineering, Peking University, Beijing 100871, China. E-mail: [zhifei.dai@pku.edu.cn](mailto:zhifei.dai@pku.edu.cn)

<sup>b</sup> School of Life Science and Technology, State Key Laboratory of Urban Water Resources and Environment, Harbin Institute of Technology, Harbin 150080, China.

### Experimental Details:

#### Chemicals:

Diethylenetriaminepentaacetic acid (DTPA, 98%, Tianjin Guangfu, China), copper(II) chloride ( $\text{CuCl}_2 \cdot 2\text{H}_2\text{O}$ , 98%, Tianjin Tianli, China), sodium sulfide ( $\text{Na}_2\text{S} \cdot 9\text{H}_2\text{O}$ , 98%, Tianjin Tianli, China), methoxy-PEG-thiol (SH-PEG; molecular weight 5000 Da, 97%, Beijing Kaizheng, China) and 3-(4,5-Dimethylthiazol-2-yl)-2,5-diphenyltetrazolium (MTT) were all of analytical grade and were used directly without further purification. RPMI-1640 cell culture medium (GIBCO) was supplemented with 10% fetal bovine serum, L-glutamine (0.29 mg/mL), 100 IU/mL penicillin and 100 mg/mL streptomycin. Millipore quality deionized water (DI water) (resistivity is 18.2 MU cm) was utilized in all experiments. The phosphate buffer saline (PBS) was prepared by mixing 8.010 g NaCl, 0.194 g KCl, 2.290 g  $\text{Na}_2\text{HPO}_4 \cdot 12\text{H}_2\text{O}$  and 0.191 g  $\text{KH}_2\text{PO}_4$  in 1.0 L water and the pH value was finally adjusted to 7.4.

#### Synthesis of CuS@DPG NPs:

The general procedure for the synthesis of CuS@DPG NPs in water was as described by Zhou et al [*J. Am. Chem. Soc.* 2010, **132**(43): 15351.] with little modifications. Briefly, DTPA (0.12 g, 0.305 mmol) was dissolved in DI water (100

mL) under stirring at 55 °C , followed by the addition of  $\text{GdCl}_3 \cdot 6\text{H}_2\text{O}$  (0.038 g, 0.102 mmol) in 34.0 mL water. The molar ratio of Gd to DTPA is 1:3. After chelating 30 minutes, SH-PEG (0.03 g, 0.006 mmol) and  $\text{CuCl}_2 \cdot 2\text{H}_2\text{O}$  (0.051 g, 0.300 mmol) were added to the above solution. After 10 min,  $\text{Na}_2\text{S} \cdot 9\text{H}_2\text{O}$  (1mL, 0.3 M) was added into the reaction mixture. The pale-blue  $\text{CuCl}_2$  solution turned dark-brown immediately upon the addition of sodium sulfide. After stirring for 5 min, the reaction mixture was heated to 90 °C and stirred for 30 min until a dark-green solution was obtained. The mixture was transferred to ice-cold water and the  $\text{CuS@DPG}$  NPs were obtained. The  $\text{CuS@DPG}$  NPs were purified by using dialysis according to the literatures<sup>1, 2</sup> and stored at 4 °C for further use. The  $\text{CuS@PEG-DTPA}$  NPs that without chelating  $\text{Gd[III]}$  ions were used as control.

#### **Characterizations of $\text{CuS@DPG}$ NPs:**

The hydrodynamic diameter (D<sub>hy</sub>) and zeta potential of  $\text{CuS@DPG}$  NPs were determined with a PALS/90Plus Particle Sizing and Potential Analyzer (Brookhaven Instruments Co., U.S.A.). The morphology of  $\text{CuS@DPG}$  nanoparticles was observed by FEI Tecnai G2 Sphera Microscope with a CCD camera operated at 100 kV. A UV-vis-Near infrared spectrophotometer was used to acquire the absorption spectrum of  $\text{CuS@DPG}$  NPs. FTIR measurement was carried out on a Varian resolution Fourier transform infrared spectrometer (Varian FTS 3100) equipped with a wide-band MCT detector, collected with 512 background scans and 4  $\text{cm}^{-1}$  resolution. Scanning was conducted in the mid-IR range from 400 to 4000  $\text{cm}^{-1}$ . Samples were prepared in the forms of potassium bromide (KBr) disk. Approximately 1 mg sample and 99 mg KBr powder was blended and triturated with agate mortar and pestle. The mixture was compacted using an IR hydraulic press at a pressure of 8 tons for 1 min.

#### **Photothermal heating experiment:**

Different concentrations of  $\text{CuS@DPG}$  NPs dispersed in RPMI-1640 culture media were suspended in quartz cuvettes (total volume of 3.0 mL), irradiated by continuous-wave diode NIR laser (Xi'an Minghui Optoelectronic Technology, China) with a center wavelength of  $808 \pm 10$  nm and output of 2 W for 10 min. The

temperature of the solutions was measured by a digital thermometer with a thermocouple probe every 10 s. For comparative study, RPMI-1640 culture media was irradiated by NIR laser as control.

#### **In vitro MR imaging:**

The experiments were done using a scanner (3T MRI Achieva, Philips, Holland). For *in vitro* MR images and  $T_1$  measurements, the CuS@DPG NPs were dispersed in aqueous solution with  $Gd^{3+}$  concentrations being 0.028, 0.045, 0.074, 0.13 and 0.173 mM respectively. The array was embedded in a phantom consisting of a tank of water to allow appropriate image acquisition.  $T_1$  value measurements were done using an inversion recovery method with a TR of 2300 ms, a TE of 15.5 ms, and the number of signal averages of 2.

#### **In vitro photothermal ablation of cancer cells with CuS@DPG NPs:**

In this study, HeLa cells (human cervical carcinoma cell) were used to evaluate the photothermal ablation with CuS@DPG nanoparticles. For qualitative analysis, HeLa cells ( $6 \times 10^4$  cells per well) were incubated in 24-well plates at 37°C in a humidified atmosphere containing 5%  $CO_2$  for 48 h. After added different concentration of CuS@DPG NPs (200  $\mu$ M, 300  $\mu$ M) based on copper, cells were then exposed to NIR laser (4 W/cm<sup>2</sup>) for 0, 5 or 10 min and stained with calcein AM (calcein acetoxymethyl ester) to verify the photohyperthermic effect on cancer cells.

In vitro cytoviability assay of CuS@DPG NPs combined with NIR laser was also carried out. HeLa cells ( $1 \times 10^4$  cells per well) were incubated in 96-well plates at 37°C for 24 h. Different concentration of CuS@DPG NPs (10, 20, 50, 100, 150  $\mu$ M in RPMI1640) were added in. Then, the cells were irradiated by NIR laser (4 W/cm<sup>2</sup>) for 0 min, 3 min or 5 min and the cell viability was measured using the MTT assay according to the manufacturer suggested procedures.

#### **In vitro cytotoxicity test of CuS@DPG NPs:**

Human Umbilical Vein Endothelial Cells (HUVECs) were used to represent a normal cell line in order to evaluate the cytotoxicity of CuS@DPG NPs. Cells were seeded into a 96-well cell culture plate with a density of  $1 \times 10^4$  cells/well in

RPMI1640 cell culture medium under CO<sub>2</sub> (5%) atmosphere at 37 °C for 24 h. Then, the cells were incubated with the CuS@DPG NPs, CuS@DTPA-PEG NPs and copper chloride with different concentrations based on copper (10, 50, 100, 200, 500, 1000 μM in RPMI1640) for 24 h at 37 °C under 5% CO<sub>2</sub>. Thereafter, MTT (20 μL, 5 mg/mL) was added to each well and the plate was incubated for 4 h at 37 °C. After the addition of dimethyl sulfoxide (DMSO, 150 μL/well), Wells were then aspirated and 150 μL dimethylsulfoxide (DMSO) was added to each well to dissolve the dark blue crystals thoroughly. The absorbance was measured at 490 nm using a microplate reader (Thermo, Multiskan MK3). The IC<sub>50</sub> values (i.e., concentration resulting in 50% growth inhibition) were calculated by the curve fitting of the cell viability data, considering the optical density of the control well as 100%.

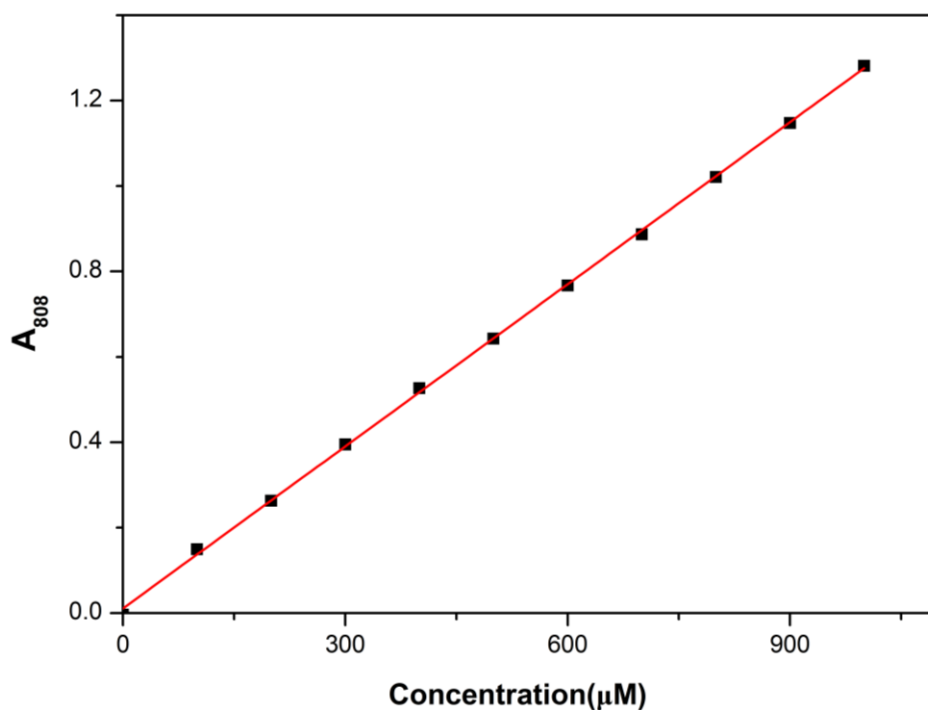

Fig. S1 Fitting curve of the UV absorption of CuS@DPG NPs at different concentrations in the medium at 808 nm ( $R^2=0.9997$ ).

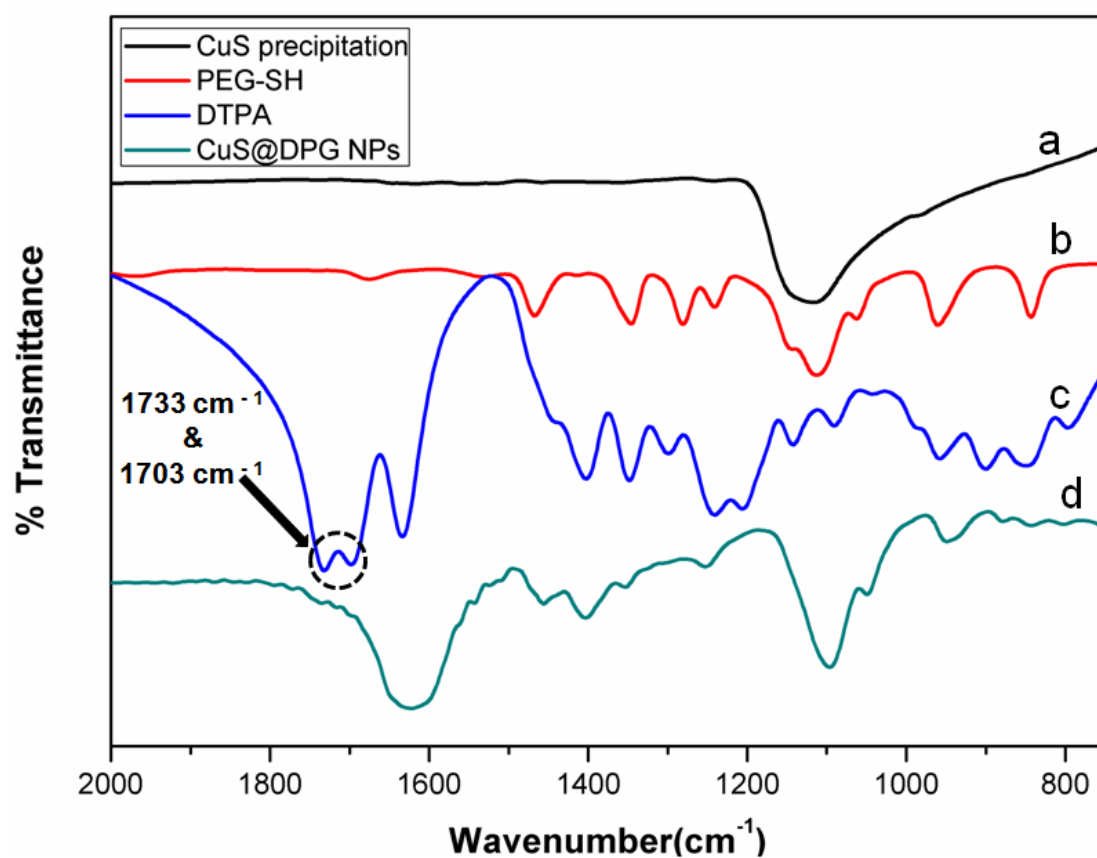

Fig. S2 FTIR spectra of a) CuS precipitation, b) PEG-SH, c) DTPA and d) CuS@DPG NPs.

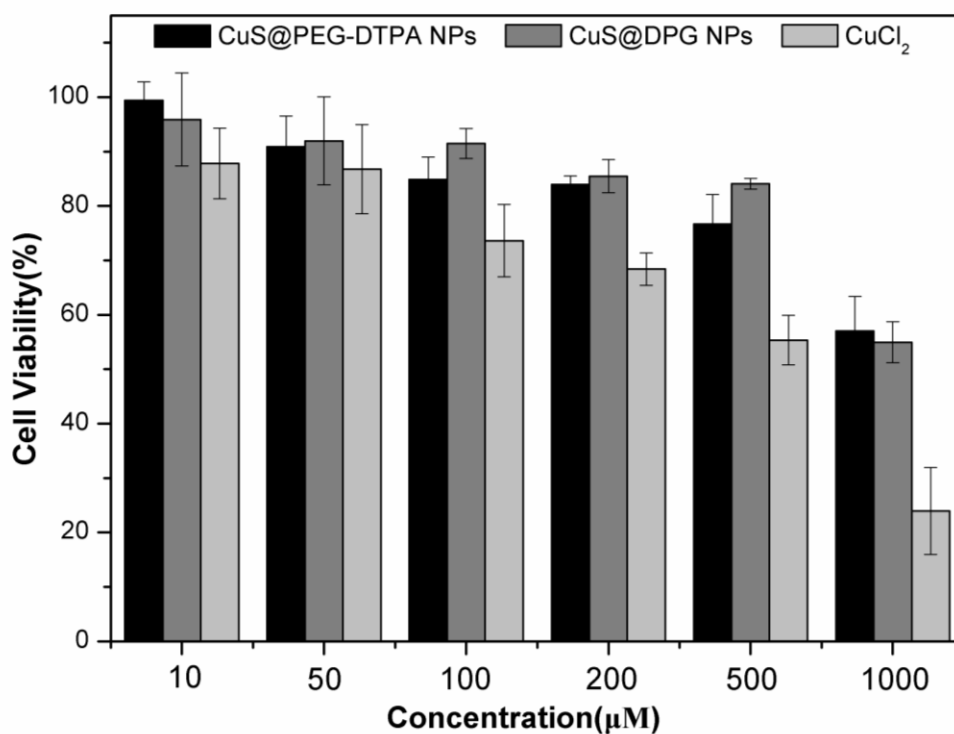

Fig. S3 Cytotoxicity of CuS@PEG-DTPA NPs, CuS@DPG NPs and CuCl<sub>2</sub> aqueous solution in HUVE cells in HUVE cells. The cells were incubated in culture medium containing NPs at concentrations ranging from 10 μM to 1 mM for 24 h.

#### References

1. H. Yang, Y. Zhuang, Y. Sun, A. Dai, X. Shi, D. Wu, F. Li, H. Hu and S. Yang, *Biomaterials*, 2011, **32**, 4584-4593.
2. K. H. Bae, Y. B. Kim, Y. Lee, J. Hwang, H. Park and T. G. Park, *Bioconjugate Chem*, 2010, **21**, 505-512.
